# Supplementary material
Source: HighWire-hosted journal article supplement (https://erj.ersjournals.com/content/49/3/1601799)
Supplement: inline-supplementary-material-1 [file inline-supplementary-material-1.pdf]

**Supplementary Table 1. Other socio-demographic characteristics and disease features of the 45 patients.**

| <b>Categorical variables</b>                 | <b>n (%)</b> |
|----------------------------------------------|--------------|
| Disease localization                         |              |
| – Pulmonary only                             | 37 (82.2)    |
| – Pulmonary + Extrapulmonary                 | 7 (15.6)     |
| – Extrapulmonary only                        | 1 (2.2)      |
| Diabetes                                     | 6 (13.3)     |
| Any other chronic immunocompromising disease | 5 (11.1)     |
| Alcohol abuse                                | 9 (20.0)     |
| Intravenous drug use                         | 18 (40.0)    |
| Active smoking                               | 33 (73.3)    |
| Homeless                                     | 38 (84.4)    |
| Previously imprisoned                        | 8 (17.8)     |
| Any psychiatric disorder                     | 6 (13.3)     |
| Previous TB treatment on admission           |              |
| – None                                       | 11 (24.4)    |
| – First-line drugs only                      | 7 (15.6)     |
| – Any second-line drug                       | 27 (60.0)    |

**Supplementary Table 2. Detailed severity and seriousness profile of the adverse events experienced by the 45 patients.**

| Categorical variables                       | n (%)     |           |            |
|---------------------------------------------|-----------|-----------|------------|
| N of patients experiencing:                 | Total AE  | Severe AE | Serious AE |
| - Gastrointestinal AE                       | 34 (75.6) | 4 (8.9)   | 1 (2.2)    |
| - Liver enzyme elevation                    | 17 (37.8) | 3 (6.7)   | 0          |
| - Oto-vestibular AE                         | 25 (55.6) | 5 (11.1)  | 0          |
| - Peripheral neuropathy                     | 18 (40.0) | 13 (28.9) | 1 (2.2)    |
| - Optic neuropathy                          | 5 (11.1)  | 1 (2.2)   | 0          |
| - Tendinopathy                              | 1 (2.2)   | 0         | 0          |
| - Arthralgia                                | 6 (13.3)  | 0         | 0          |
| - Anaemia                                   | 5 (11.1)  | 0         | 0          |
| - Neutropenia                               | 1 (2.2)   | 0         | 0          |
| - Thrombocytopenia                          | 6 (13.3)  | 0         | 0          |
| - Renal failure                             | 5 (11.1)  | 2 (4.4)   | 0          |
| - Hypothyroidism                            | 3 (6.7)   | 0         | 0          |
| - Any psychiatric disorder                  | 10 (22.2) | 2 (4.4)   | 0          |
| - Allergy / skin rash                       | 8 (17.8)  | 0         | 0          |
| - QT prolongation                           | 13 (28.9) | 5 (11.1)  | 0          |
| - Others                                    | 10 (22.2) | 10 (22.2) | 6          |
| o Pancreatitis                              | 1 (2.2)   | 1 (2.2)   | 0          |
| o Sepsis, bacterial                         | 1 (2.2)   | 1 (2.2)   | 1 (2.2)    |
| o Sepsis, candida                           | 1 (2.2)   | 1 (2.2)   | 1 (2.2)    |
| o Pulmonary embolism                        | 1 (2.2)   | 1 (2.2)   | 0          |
| o Coronary dissection during coronarography | 1 (2.2)   | 1 (2.2)   | 1 (2.2)    |
| o Drug-associated pneumonia (not confirmed) | 1 (2.2)   | 1 (2.2)   | 0          |
| o Stroke                                    | 1 (2.2)   | 1 (2.2)   | 0          |
| o Deep vein thrombosis                      | 1 (2.2)   | 1 (2.2)   | 0          |
| o Death                                     | 3 (6.7)   | 3 (6.7)   | 3 (6.7)    |

AE = adverse events

**Supplementary Table 3. Comparison of baseline characteristics of patients receiving standard ( $\leq 190$  days) or prolonged ( $>190$  days) bedaquiline (Bdq) treatment.**

| <b>Categorical variables, n (%)</b>                       | <b>Standard Bdq treatment<br/>(N=12)</b> | <b>Prolonged Bdq treatment<br/>(N=33)</b> | <b>p-value</b> |
|-----------------------------------------------------------|------------------------------------------|-------------------------------------------|----------------|
| Sex, male                                                 | 6 (50.0)                                 | 30 (90.9)                                 | 0.006          |
| XDR-TB patient                                            | 4 (33.3)                                 | 20 (60.6)                                 | 0.176          |
| HIV infection                                             | 0                                        | 2 (6.0)                                   | 1.000          |
| HCV infection                                             | 2 (16.7)                                 | 19 (57.6)                                 | 0.020          |
| Bilateral pulmonary involvement                           | 6 (63.6) (N=11)                          | 29 (87.9)                                 | 0.092          |
| Cavities on chest radiography                             | 9 (81.8) (N=11)                          | 30 (90.9)                                 | 0.586          |
| Culture positive on sputum at treatment start             | 9 (75.0)                                 | 32 (97)                                   | 0.048          |
| Smear positive on sputum at treatment start               | 11 (91.7)                                | 31 (93.9)                                 | 0.616          |
| Any previous tuberculosis treatment                       | 3 (25.0)                                 | 31 (94)                                   | <0.001         |
| Previous treatment with second-line drugs                 | 1 (8.3)                                  | 26 (78.8)                                 | <0.001         |
| <b>Continuous variables, median (interquartile range)</b> |                                          |                                           |                |
| Age at admission (years)                                  | 41 (27 – 56)                             | 38 (30 – 40)                              | 0.209          |
| Number of molecules to which the isolate was resistant    | 6 (5 – 13)                               | 9 (8 – 11)                                | 0.171          |
| Body mass index                                           | 20.1 (17.3 – 22.9)                       | 19.4 (17.9 – 21.8)                        | 0.626          |
| Albumin                                                   | 32.8 (30.8 – 37.4)                       | 32.5 (26.9 – 36.6)                        | 0.472          |

XDR-TB = extensively drug-resistant tuberculosis.
